# Supplementary material for: A rice calcium-dependent protein kinase OsCPK9 positively regulates drought stress tolerance and spikelet fertility
Source: PubMed Central journal article supplement (PMC4036088; doi:10.1186/1471-2229-14-133), 2014-05-17
Supplement: 1471-2229-14-133-S1.pdf [file 1471-2229-14-133-S1.pdf]

# Additional files

**A rice calcium-dependent protein kinase *OsCPK9* positively regulates drought stress tolerance and spikelet fertility**

**Short running title: *OsCPK9* gene function in rice**

Shuya Wei<sup>a</sup>, Wei Hu<sup>a§</sup>, Xiaomin Deng<sup>a§</sup>, Yingying Zhang, Xiaodong Liu, Xudong Zhao, Qingchen Luo, Zhengyi Jin, Yin Li, Shiyi Zhou, Tao Sun, Lianzhe Wang, Guangxiao Yang\*, Guangyuan He\*

**Table S1. PCR primers used in qRT-PCR analysis**

| Gene           | Forward primer                 | Reverse primer               |
|----------------|--------------------------------|------------------------------|
| <i>OsZIP23</i> | 5'-TTTGCCTTCGGAGGACTCTG-3'     | 5'-GGCAGATCGATCTGGCGATT-3'   |
| <i>Rab21</i>   | 5'-CACACCACAGCAAGAGCTAAGTG-3'  | 5'-TGGTGCTCCATCCTGCTTAAG-3'  |
| <i>OsLEA3</i>  | 5'- AATGATTTCCCTTTGGGTC-3'     | 5'- CATCAGTACACATCACCCA-3'   |
| <i>OsP5CS</i>  | 5'-CAGAGTTGATAGTGCTGCTG-3'     | 5'-CAGGCTAAAAGGAGCATTG-3'    |
| <i>OsNAC6</i>  | 5'-CCATGGCAGCTTCCCCGGAT-3'     | 5'-CCAATCATCCAACCTGAGGC-3'   |
| <i>OsRSUS</i>  | 5'-TCAACCTACTGGGACAATATTTAC-3' | 5'-GCGTTTATTTGAGGCAAGCACT-3' |
| <i>OsZIP66</i> | 5'- AACGTGGAGAAGGTGGTGG -3'    | 5'-TTCCTCCTGTTTCTTCTG-3'     |
| <i>OsZIP72</i> | 5'- AATGAGGTAGAAGAAATGAT-3'    | 5'- GCACAGTCGCTGATGAAGG -3'  |
| <i>OsNAC9</i>  | 5'-CTGAGCTACGACGATATCCA -3'    | 5'-GAAGAGCGACGAGTAGAAGT -3'  |
| <i>OsNAC45</i> | 5'-ATATGCCTCCACCTCCTCCT -3'    | 5'-CATCTCGTAGGGCTTTCACC -3'  |
| <i>OsCPK9</i>  | 5'-TTGACGGCAGCGGCTACAT-3'      | 5'-GCTGTTGCTGAGCGTCTTG-3'    |
| <i>ACTIN</i>   | 5'-ATGGTGGTGACGGGTGAC-3'       | 5'-CAGACACTAAAGCGCCCCGGTA-3' |

**Table S2. Primer sequences used in plasmids construction and PCR**

| Primer | Sequence                                | Purpose                                      |
|--------|-----------------------------------------|----------------------------------------------|
| P1     | 5'-GCTCTAGAAGATCGCCATGGGCAACAC-3'       | OsCPK9 amplification for rice transformation |
| P2     | 5'-CGGGATCCAATGCTGAAACAATCCAGCGT TCA-3' |                                              |
| P3     | 5'-GGGGTACCTTGTGCCAGATATTTGCTCC-3'      | RNAi intron fragment amplification           |
| P4     | 5'-GGACTAGTTGATATCCGTTCTGTTTCTA-3'      |                                              |
| P5     | 5'-GCTCTAGAACCACCGATGAGGTGGGCGC-3'      | RNAi sense fragment amplification            |
| P6     | 5'-GGGGTACCCGAGCTGGTACTTGCCGTG-3'       |                                              |
| P7     | 5'-CGGGATCCACCACCGATGAGGTGGGCGC-3'      | RNAi antisense fragment amplification        |
| P8     | 5'-GGACTAGTCGAGCTGGTACTTGCCGTG-3'       |                                              |
| P9     | 5'-ACGGTGTCGTCCATCACAGTTTGCC-3'         | Positive plants identified                   |
| P10    | 5'-GGAAGTGCTTGACATTGGGGAGT-3'           |                                              |

**Table S3. Growth indices of WT, VC and positive transgenics (mean  $\pm$ SE) under normal growth conditions or after osmotic treatment followed by 7 days recovery (\* $p$  <0.05; \*\* $p$  <0.01)**

| line | Root length (cm) |                   | Shoot length (cm) |                    | Fresh weight (g)  |                     | Wilted leaves (%) | Green leaves (%)   |
|------|------------------|-------------------|-------------------|--------------------|-------------------|---------------------|-------------------|--------------------|
|      | Control          | 20%PEG            | Control           | 20%PEG             | Control           | 20%PEG              | 20%PEG            | 20%PEG             |
| WT   | 5.28 $\pm$ 0.14  | 5.80 $\pm$ 0.17   | 21.13 $\pm$ 0.45  | 18.04 $\pm$ 1.15   | 0.125 $\pm$ 0.006 | 0.194 $\pm$ 0.025   | 77.23 $\pm$ 5.03  | 22.67 $\pm$ 4.98   |
| VC   | 5.10 $\pm$ 0.12  | 5.60 $\pm$ 0.12   | 21.02 $\pm$ 0.92  | 16.78 $\pm$ 2.60   | 0.115 $\pm$ 0.008 | 0.199 $\pm$ 0.023   | 77.68 $\pm$ 6.13  | 22.20 $\pm$ 6.07   |
| OE28 | 5.41 $\pm$ 0.13  | 6.90 $\pm$ 0.33** | 20.26 $\pm$ 0.72  | 22.05 $\pm$ 1.41*  | 0.125 $\pm$ 0.004 | 0.322 $\pm$ 0.013** | 66.68 $\pm$ 2.98* | 33.17 $\pm$ 2.98*  |
| OE16 | 5.48 $\pm$ 0.34  | 7.38 $\pm$ 0.44** | 21.00 $\pm$ 0.38  | 23.67 $\pm$ 2.20*  | 0.110 $\pm$ 0.005 | 0.271 $\pm$ 0.049*  | 65.83 $\pm$ 4.36* | 30.33 $\pm$ 6.91*  |
| Ri16 | 5.05 $\pm$ 0.16  | 5.57 $\pm$ 0.18   | 19.84 $\pm$ 0.50  | 15.87 $\pm$ 1.24   | 0.108 $\pm$ 0.004 | 0.174 $\pm$ 0.015   | 79.50 $\pm$ 6.87  | 16.67 $\pm$ 5.43   |
| Ri2  | 4.92 $\pm$ 0.23  | 5.00 $\pm$ 0.27** | 19.98 $\pm$ 0.75  | 13.63 $\pm$ 1.43** | 0.100 $\pm$ 0.001 | 0.151 $\pm$ 0.006*  | 88.33 $\pm$ 5.27* | 11.67 $\pm$ 5.27 * |

**Table S4. Growth indices of WT, VC and positive transgenics (mean  $\pm$ SE) under normal growth conditions or after dehydration treatment followed by 10 days recovery (\* $p$  <0.05; \*\* $p$  <0.01.)**

| line | Root length (cm) |                   | Shoot length (cm) |                    | Fresh weight (mg) |                      |
|------|------------------|-------------------|-------------------|--------------------|-------------------|----------------------|
|      | Control          | dehydration       | Control           | dehydration        | Control           | dehydration          |
| WT   | 4.04 $\pm$ 0.37  | 4.77 $\pm$ 0.09   | 20.84 $\pm$ 0.35  | 9.67 $\pm$ 4.37    | 170.88 $\pm$ 3.33 | 140.06 $\pm$ 39.26   |
| VC   | 4.34 $\pm$ 0.21  | 5.00 $\pm$ 0.19   | 19.00 $\pm$ 0.55  | 8.15 $\pm$ 3.88    | 165.36 $\pm$ 2.52 | 146.92 $\pm$ 20.28   |
| OE28 | 4.38 $\pm$ 0.28  | 6.53 $\pm$ 0.41** | 19.70 $\pm$ 0.77  | 19.13 $\pm$ 1.26** | 178.20 $\pm$ 2.27 | 263.10 $\pm$ 28.36** |
| OE16 | 4.43 $\pm$ 0.37  | 6.20 $\pm$ 0.15** | 20.75 $\pm$ 1.60  | 21.78 $\pm$ 1.74** | 177.90 $\pm$ 4.10 | 249.13 $\pm$ 27.64*  |
| Ri16 | 4.48 $\pm$ 0.80  | 4.80 $\pm$ 0.29   | 21.70 $\pm$ 0.41  | 9.00 $\pm$ 4.17    | 177.96 $\pm$ 4.01 | 146.64 $\pm$ 16.54   |
| Ri2  | 4.45 $\pm$ 0.10  | 4.42 $\pm$ 0.12*  | 20.80 $\pm$ 0.20  | 6.18 $\pm$ 4.02    | 181.46 $\pm$ 2.44 | 130.58 $\pm$ 13.68   |

**Table S5. The number of open, closed, and partially open stomata in control plants and transgenic lines under normal conditions or drought treatment.**

| Stomatal status          | Normal(number) |         |         |            |         |            | Drought(number) |         |           |             |           |           |
|--------------------------|----------------|---------|---------|------------|---------|------------|-----------------|---------|-----------|-------------|-----------|-----------|
|                          | WT             | VC      | OE28    | OE16       | Ri16    | Ri2        | WT              | VC      | OE28      | OE16        | Ri16      | Ri2       |
| <b>Completely closed</b> | 11.33±0.88     | 12±0.58 | 13±0.58 | 12.67±0.33 | 11±0.58 | 10±0.58    | 21±0.58         | 22±0.58 | 31±1.15** | 29±1.15**   | 18±0.58*  | 16±0.58*  |
| <b>Partially open</b>    | 21±1.53        | 21±0.58 | 23±0.58 | 22±0.58    | 19±0.58 | 18.67±0.88 | 24±1.00         | 24±1.00 | 24±0.58   | 22.67±1.20  | 21±0.58   | 19±0.58*  |
| <b>Completely open</b>   | 27.67±1.45     | 27±0.58 | 24±0.58 | 25.33±0.67 | 30±0.58 | 31.33±1.20 | 15±0.58         | 14±0.58 | 5±0.58**  | 8.33±0.88** | 21±0.58** | 25±0.58** |
| <b>Total</b>             | 60             | 60      | 60      | 60         | 60      | 60         | 60              | 60      | 60        | 60          | 60        | 60        |

\* $p < 0.05$ ; \*\* $p < 0.01$ .

**Table S6. Growth indices of WT, VC and positive transgenics (mean ±SE) under normal growth and 1 μM ABA conditions**

| line | Root length (cm) |             | Shoot length (cm) |              | Root dry weight (mg) |             | Shoot dry weight (mg) |              |
|------|------------------|-------------|-------------------|--------------|----------------------|-------------|-----------------------|--------------|
|      | Control          | 1 μM ABA    | Control           | 1 μM ABA     | Control              | 1 μM ABA    | Control               | 1 μM ABA     |
| WT   | 6.88±0.17        | 5.98±0.14   | 23.46±0.53        | 18.89±1.46   | 5.75±0.05            | 7.80±0.34   | 12.93±0.69            | 14.28±1.54   |
| VC   | 6.92±0.38        | 5.70±0.23   | 21.10±0.87        | 18.68±1.21   | 5.76±0.71            | 7.28±0.21   | 13.22±0.76            | 13.22±0.80   |
| OE28 | 6.72±0.20        | 5.13±0.33** | 20.46±2.26        | 16.11±1.66   | 5.78±0.29            | 5.65±0.21** | 13.53±0.56            | 11.94±0.27*  |
| OE16 | 6.83±0.20        | 5.38±0.40*  | 19.86±1.49        | 14.73±1.05** | 5.85±0.28            | 5.48±0.27** | 13.05±0.42            | 10.20±0.55** |
| Ri16 | 6.53±0.25        | 6.02±0.24   | 20.13±2.17        | 20.06±2.12   | 5.72±0.46            | 7.32±0.13   | 13.54±1.47            | 13.53±1.37   |
| Ri2  | 6.48±0.39        | 6.34±0.17*  | 21.18±2.82        | 20.17±2.74   | 5.68±0.07            | 8.22±0.42   | 16.30±1.81            | 16.30±1.81   |

\* $p < 0.05$ ; \*\* $p < 0.01$ .

**Table S7. Growth indices of WT, VC and positive transgenics (mean  $\pm$ SE) under normal growth and 3  $\mu$ M ABA conditions**

| line | Root length (cm) |                   | Shoot length (cm) |                   | Root dry weight (mg) |                   | Shoot dry weight (mg) |                   |
|------|------------------|-------------------|-------------------|-------------------|----------------------|-------------------|-----------------------|-------------------|
|      | Control          | 3 $\mu$ M ABA     | Control           | 3 $\mu$ M ABA     | Control              | 3 $\mu$ M ABA     | Control               | 3 $\mu$ M ABA     |
| WT   | 5.88 $\pm$ 0.14  | 3.31 $\pm$ 0.34   | 19.76 $\pm$ 0.16  | 7.50 $\pm$ 0.66   | 7.95 $\pm$ 0.61      | 5.53 $\pm$ 0.25   | 19.10 $\pm$ 1.39      | 6.05 $\pm$ 0.70   |
| VC   | 6.00 $\pm$ 0.16  | 3.47 $\pm$ 0.29   | 18.78 $\pm$ 0.33  | 7.00 $\pm$ 0.34   | 7.66 $\pm$ 0.72      | 5.78 $\pm$ 0.22   | 20.03 $\pm$ 1.87      | 5.82 $\pm$ 0.62   |
| OE28 | 5.94 $\pm$ 0.55  | 1.04 $\pm$ 0.18** | 19.55 $\pm$ 0.58  | 3.18 $\pm$ 0.19** | 7.56 $\pm$ 0.33      | 1.57 $\pm$ 0.25** | 19.72 $\pm$ 1.05      | 2.67 $\pm$ 0.41** |
| OE16 | 6.04 $\pm$ 0.22  | 0.98 $\pm$ 0.04** | 20.50 $\pm$ 0.72  | 4.26 $\pm$ 0.34** | 7.73 $\pm$ 0.17      | 1.24 $\pm$ 0.16** | 18.16 $\pm$ 0.59      | 2.67 $\pm$ 0.35** |
| Ri16 | 6.03 $\pm$ 0.10  | 3.20 $\pm$ 0.11   | 20.31 $\pm$ 0.73  | 6.80 $\pm$ 0.37   | 7.86 $\pm$ 0.16      | 6.04 $\pm$ 0.63   | 19.75 $\pm$ 0.62      | 6.02 $\pm$ 0.23   |
| Ri2  | 5.83 $\pm$ 0.13  | 3.93 $\pm$ 0.51   | 18.23 $\pm$ 0.29  | 6.60 $\pm$ 0.17   | 7.64 $\pm$ 0.21      | 6.80 $\pm$ 0.38** | 20.37 $\pm$ 0.69      | 6.13 $\pm$ 0.40   |

\* $p$  <0.05; \*\* $p$  <0.01.

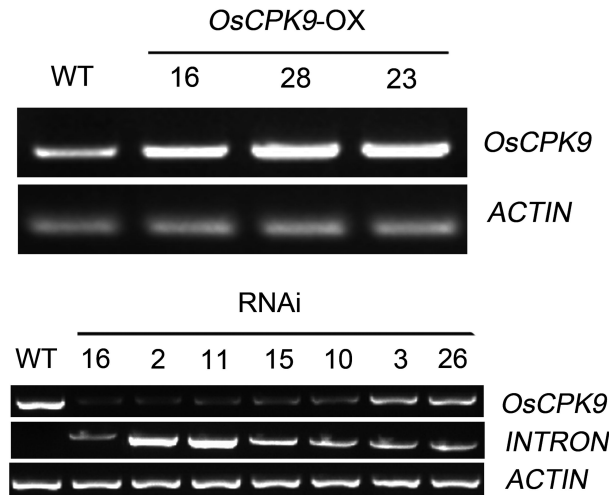

**Fig. S1.** The expression of *OsCPK9* in transgenic lines.

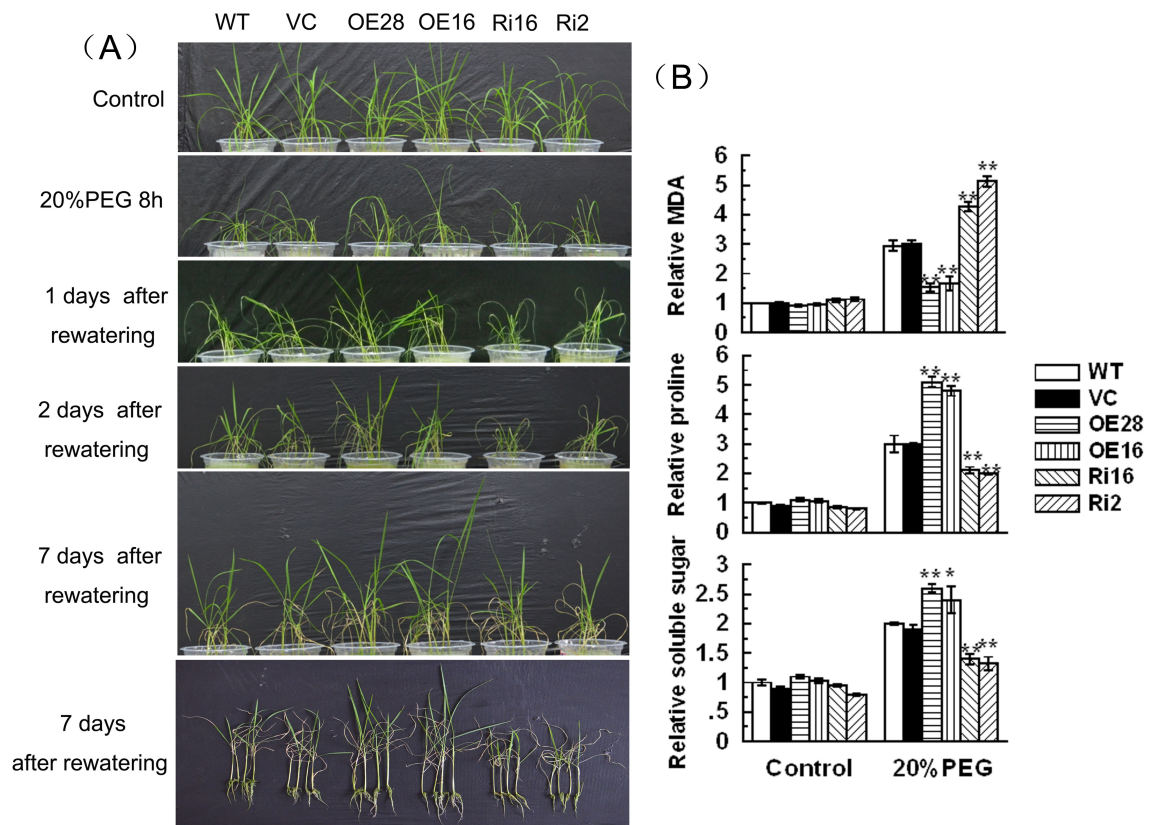

**Fig. S2.** Analysis of osmotic stress tolerance of *OsCPK9*-OX and *OsCPK9*-RNAi transgenic plants. Two-week-old rice seedlings were exposed to 20% PEG for 8 h and then the seedlings were recovered for 7 d to detect the performance of transgenic lines and WT (A). After PEG treatment for 8 h, leaves of rice seedling were collected

to examine MDA, proline and soluble sugar (B). Data are means  $\pm$ SE calculated from four independent experiments. Asterisks indicate significant difference between the WT and transgenic lines ( $*p < 0.05$ ;  $**p < 0.01$ ).

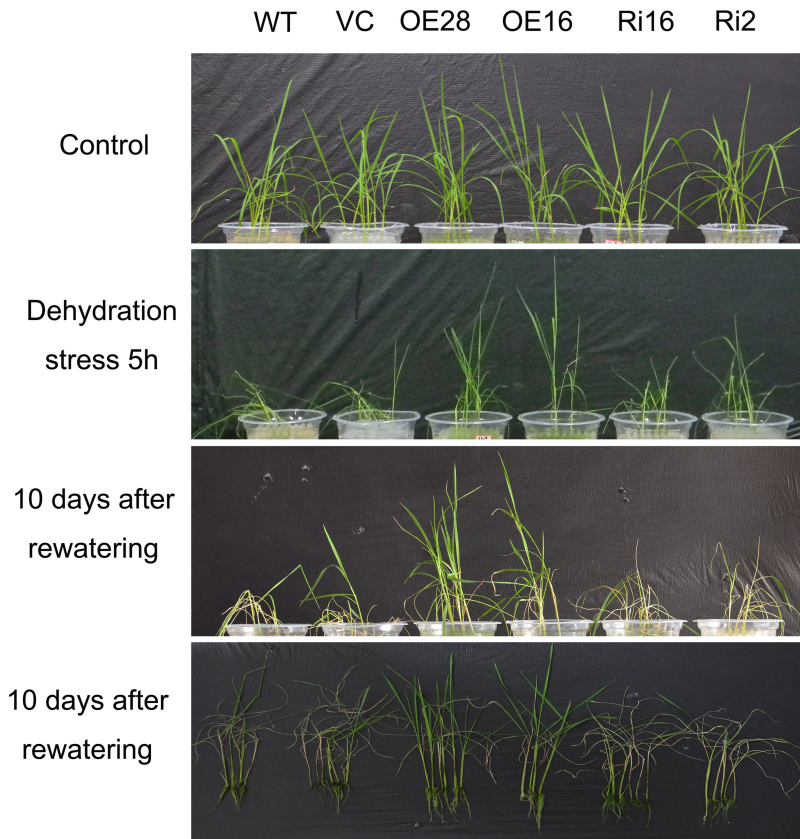

**Fig. S3. Analysis of dehydration stress tolerance of *OsCPK9-OX* and *OsCPK9-RNAi* transgenic plants.** Two-week-old rice seedlings were exposed to air for 5 h and then the seedlings were recovered for 10 d to detect the performance of transgenic lines and WT. Three biological experiments were conducted, which produced similar results.

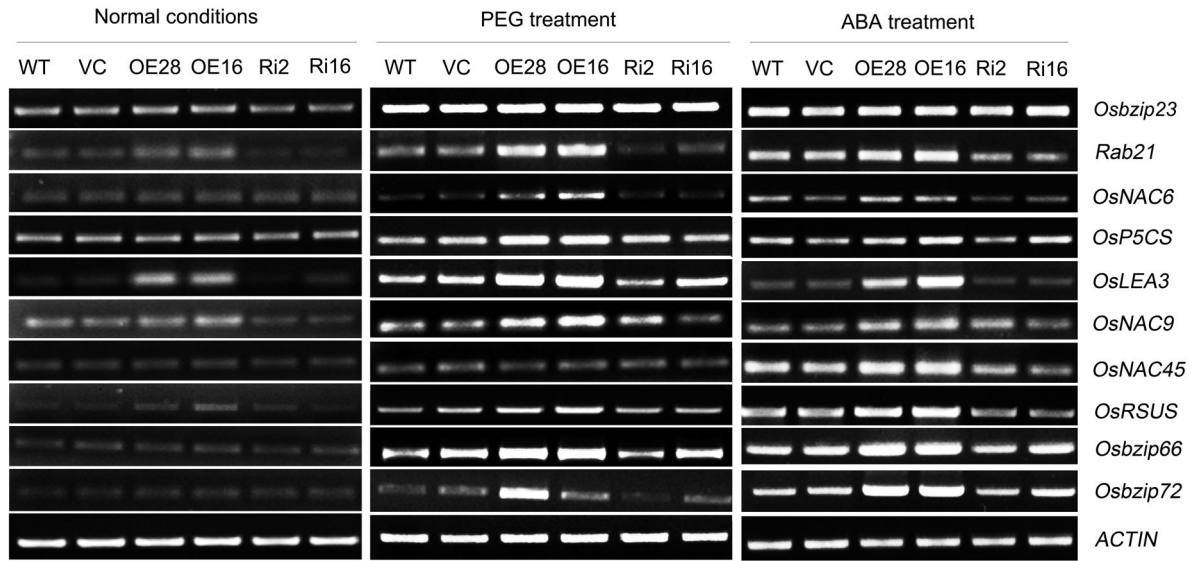

**Fig. S4. Expression analysis of some selected ABA- and stress-responsive genes by RT-PCR analysis under no stress, ABA, or PEG6000 treatments in *OsCPK9-OX*, *OsCPK9* RNAi, and control lines.** Three-day-old seedlings were exposed to 1  $\mu$ M ABA for 14 d. Two-week-old rice plants were treated without (normal conditions) or with 20% PEG6000 for 8 h. Rice leaves were collected to detect expression of those ABA- and stress-responsive genes. Two biological experiments were performed, which produced similar results.
